# Supplementary material for: The predictive value of highly malignant EEG patterns after cardiac arrest: evaluation of the ERC-ESICM recommendations
Source: Springer Nature journal article supplement (doi:10.1007/s00134-023-07280-9), 2024-01-01
Supplement: MOESM1 [file 134_2023_7280_MOESM1_ESM.pdf]

## ESM Figure E1 – Highly malignant EEG patterns

Burst-suppression without discharges

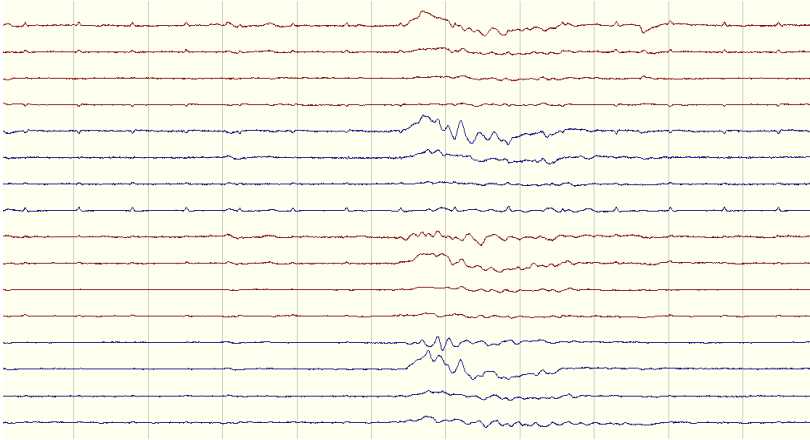

Burst-suppression with discharges

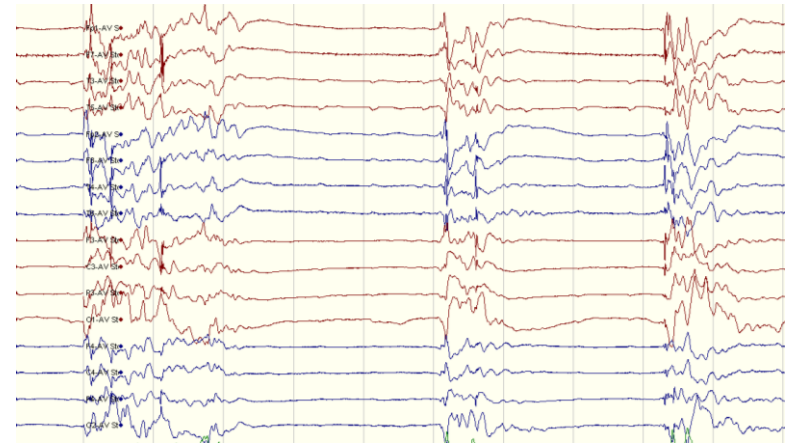

Suppression without discharges

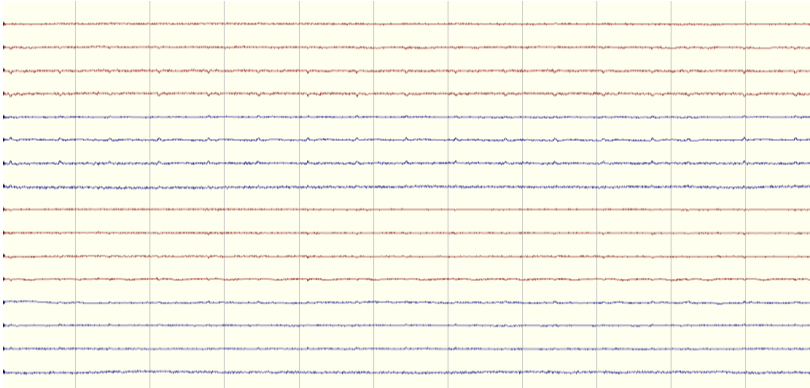

Suppression with discharges

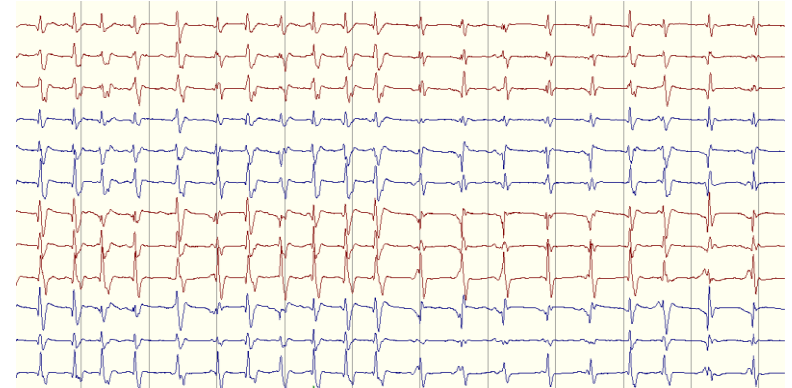

Highly malignant patterns defined using the standardized EEG terminology by the American Clinical Neurophysiology Society:  
Burst-suppression (amplitude  $<10\mu\text{V}$ ,  $\geq 50\%$  of the recording) without discharges; Burst-suppression with discharges;  
Suppressed background (amplitude  $<10\mu\text{V}$  the entirety of the record) without discharges; Suppressed background with periodic discharges.
